# Supplementary material for: Identification of New Peptides from Fermented Milk Showing Antioxidant Properties: Mechanism of Action
Source: PubMed Central journal article supplement (PMC7070694; doi:10.3390/antiox9020117), 2020-01-29
Supplement: antioxidants-09-00117-s001.pdf [file antioxidants-09-00117-s001.pdf]

# Identification of new peptides from fermented milk showing antioxidant properties: mechanism of action

Federica Tonolo<sup>1a</sup>, Federico Fiorese<sup>1a</sup>, Laura Moretto<sup>1</sup>, Alessandra Folda<sup>1</sup>, Valeria Scalcon<sup>1</sup>, Alessandro Grinzato<sup>1</sup>, Stefania Ferro<sup>1</sup>, Giorgio Arrigoni<sup>1</sup>, Alberto Bindoli<sup>2</sup>, Emiliano Feller<sup>3</sup>, Marco Bellamio<sup>3</sup>, Oriano Marin<sup>1\*</sup> and Maria Pia Rigobello<sup>1\*</sup>

<sup>1</sup> Department of Biomedical Sciences, University of Padova, Padova, Italy.

<sup>2</sup> Institute of Neuroscience, CNR, Padova, Italy.

<sup>3</sup> Centrale del Latte di Vicenza S.p.A., Vicenza, Italy.

\* Correspondence: [mariapia.rigobello@unipd.it](mailto:mariapia.rigobello@unipd.it), [oriano.marin@unipd.it](mailto:oriano.marin@unipd.it);

**Figure S1.** Fraction 6 uptake from Caco-2 cell monolayer. Cells were incubated in the presence of fraction 6 (150  $\mu$ g) and the RP-HPLC analysis of apical (AP) and basolateral (BL) compartments was performed at the indicated time (10' and 120',  $\lambda=220$  nm).

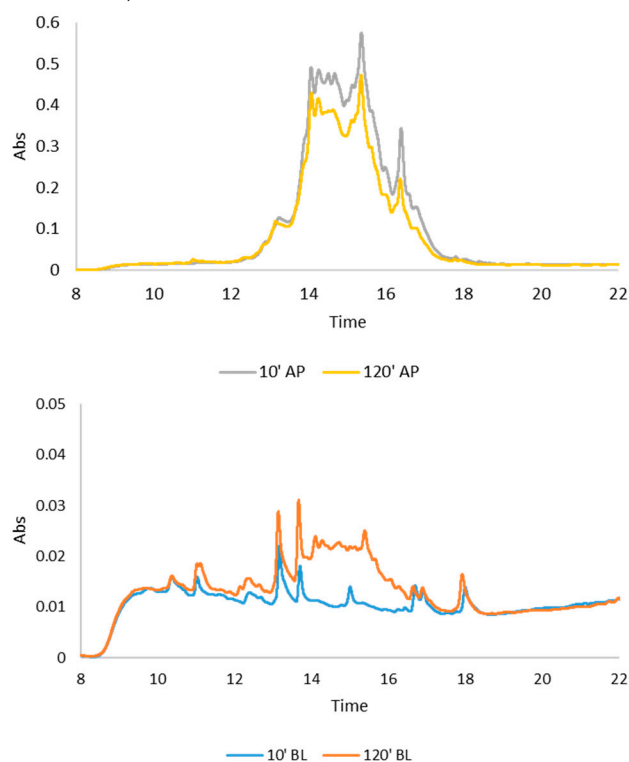

**Figure S2.** Alignments between the reference proteins and the peptides identified by Proteome Discoverer and Mascot search. Oxidized methionine residues are indicated in lowercase (m); #PSM values are indicated in brackets near to each peptide sequence. The alignments are reported separated for each reference protein.

**>P02668 Kappa-casein**

```

      10      20      30      40      50      60      70      80      90
MMKSFFLVVTTILALTLPLFLGAQEONQEQPIRCEKDERFFSDKIAKYIPIQYVLSRYPSYGLNYYQQKPVALLINNQFLPYPYYAKPAAVRSPAQILQWQ
      KYIPIQYVLS (10)                      NQFLPYPYYAKPA (22)
      QYVLSRYPSYGIN (26)                  INNQFLPYPYYAKPA (51)
      KYIPIQYVL (2)                       QFLPYPYYAKPA (19)
      SRYPYGLNYYQQKPV (2)
      VLSRYPSYGLNYYQQKPV (2)
      RYPYGLNYYQQKPV (2)
      ALINNQFLPYPYYAKPA (2)
      YIPIQYVLS (1)
      FSDKIAKYIPI (1)
      LSRYPYGLNYYQQKPV (1)
      VLSRYPSYGIN (1)
      IAKYIPIQYV (1)
      IAKYIPIQY (1)
      QYVLSRYPSYGLNYYQQKPV (1)
      IAKYIPIQYVLS (1)
      FLPYPYYAKPA (1)
      NNQFLPYPYYAKPA (1)
      FLPYPYYAKPAAV (1)
      QFIPYPYYA (1)
      NQFLPYPYY (1)
      QFLPYPYYAKPAAVRSPA (1)
      KPAAVRSPAQIL (1)
      YAKPAAVRSPA (1)
      AVRSPAQILQWQ (1)

100      110      120      130      140      150      160      170      180      190
VLSNTVPAKSCQAQPTTMARHPHPLSFMAIPPCKKNQDKTEIPTINTIASGEPTSTPTTEAVESTVATLEDSPEVIESPPEINTVQVTSTAV
      RHPHPLSFm (12)                      VIESPPEINTVQVTSTAV (1)
      TMARHPHPLSFm (4)                   VIESPPEINTVQ (1)
      DKTEIPTINTIASGEPT (7)
      TmARHPHPLSFm (1)
      ARHPHPLSFMAIPPCKKNQ (3)
      RHPHPLSFMAIPPCKKNQ (3)
      RHPHPLSFm (3)      DKTEIPTINTIASGEPTSTPTTE (2)

```

DKTEIPTINTIASGEPTSTPTTEAVE (2)  
QDKTEIPTINTIASGEPTSTPTTE (2)

HPHPHLSFm (2)  
ARHPHPHLSFmAIPPKKNQ (2)  
TMARHPHPHLSFm (2)  
RHPHPHLSFmAIPPKKNQ (2)  
LSFmAIPPKKNQ (1)

NTVPAKSCQAQPTTm (1)  
SNTVPAKSCQAQPTTm (1)  
ARHPHPHLSFmAIPPKKNQD (1)  
DKTEIPTINTIASGEPTSTPT (1)  
KTEIPTINTIASGEPT (1)  
QDKTEIPTINTIASGEPT (1)  
AIPPKKNQDKTEIPTINTIASGEPTSTPTTE (1)

**P02666 Beta-casein**

10 20 30 40 50 60 70 80 90 100 110  
MKVLILACLVALALARELEELNVPGEIVESLSSESSEESITRINKKIEKFQSEEQQTEDELQDKIHHPFAQTQSLVYFPFGPIPNSLPQNIPPLTQTPVVVPPFLQPEVMGV  
NVPGEIVESL (8) EQQTEDELQDKIHHPF (1) VYFPFGPIPN (8) VVPPFLQPE (2)  
RELEELNVPGEIVE (1) QSEEQQTEDELQDKIHHPF (1) NIPPLTQTPV (1)  
EDELQDKIHHPF (1)  
SEEQQTEDELQDKIHHPF (1)  
DELQDKIHHPF (1)  
ELQDKIHHPFAQTQSL (1)  
ELQDKIHHPF (1)

120 130 140 150 160 170 180 190 200 210 220  
SKVKEAMAPKHKEMPFPKYPVEPFOTESQLTLTDVENLHLPLPLLSWMMHQP HQPLPPTVMFPPQSVLSLSQSKVLPVPQKAVPYPQRDMPIQAFLLYQEPVLPVVRGPF  
HKEMPFPKYPVEPFOTESQ (6) SWMMHQP HQPLPPT (4) S QSKVLPVPQKAVPYPQ (4)  
HKEMPFPKYPVEPF (3) SLSQSKVLPVPQKAVPYPQ (2)  
KEMPFPKYPVEPF (2) VmFPPQSVL (1)  
KEMPFPKYPVEPFOTESQ (2) SKVLPVPQKAVPYPQ (2)  
EmFPFKYPVEPFOTESQ (2) LSQSKVLPVPQKAVPYPQ (2)  
PFPKYPVEPFOTESQ (2) SLSQSKVLPVPQKAVPYPQR (2)  
KEmFPFKYPVEPF (2) SWMMHQP HQPLPPT (1)



APSFSDIPNPIGSENSEKT (2)  
 YTDAPSFSDIPNPIGSENSE (1)  
 GTQYTDAPSFSDIPNPIGSE (1)  
 TDAPSFSDIPNPIGSENSEK (1)  
 QYTDAPSFSDIPNPIGSENSEK (1)  
 DAPSFSDIPNPIGSENSE (1)  
 APSFSDIPNPIGSENSEK (1)  
 DAPSFSDIPNPIGSENSEK (1)  
 QYTDAPSFSDIPNPIGSE (1)  
 QYTDAPSFSDIPNPIGSENSE (1)  
 TQYTDAPSFSDIPNPIGSENSE (1)  
 IPNPIGSENSEKTTMP (1)  
 SDIPNPIGSENSEKTTMPLW (1)  
 FSDIPNPIGSENSEKTTmP (1)  
 IPNPIGSENSEKTTmPLW (1)  
 IPNPIGSENSEKTTMPLW (1)  
 FSDIPNPIGSENSEKTTMP (1)  
 DAPSFSDIPNPIGSE (1)

**>P02663 Alpha-S2-casein**

|                                                                                                                |     |     |     |     |                       |                  |     |                    |                    |     |
|----------------------------------------------------------------------------------------------------------------|-----|-----|-----|-----|-----------------------|------------------|-----|--------------------|--------------------|-----|
| 10                                                                                                             | 20  | 30  | 40  | 50  | 60                    | 70               | 80  | 90                 | 100                | 110 |
| MKFFIFTCLLAVALAKNTMEHVSSEESIISQETYSQEKMAINPSKENLCSTFCKEVVRNANEEYSIGSSSEESAEVATEEVKITVDDKHYQKALNEINQFYQKFPQY    |     |     |     |     |                       |                  |     |                    |                    |     |
| 120                                                                                                            | 130 | 140 | 150 | 160 | 170                   | 180              | 190 | 200                | 210                | 220 |
| LQYLYQGPIVLNPWDQVKNAPITPTLNREQLSTSEENSKKTVDMESTEVEFTKTKLTEEEKNRLNFLKKISQRYQKFALPQYLKTVYQHQAAMKPWIQPKTKVIPYVRYL |     |     |     |     |                       |                  |     |                    |                    |     |
| QGPIVLNPWDQVKR (3)                                                                                             |     |     |     |     | TKTKLTEEEKNRLNFLK (1) |                  |     | ALPQYLKTVYQHQA (2) |                    |     |
| QGPIVLNPWDQVKN (2)                                                                                             |     |     |     |     |                       | FLKKISQRYQKF (1) |     |                    |                    |     |
| QGPIVLNPWDQVK (1)                                                                                              |     |     |     |     |                       |                  |     | PQYLKTVYQHQA (1)   |                    |     |
| YQGPIVLNPWDQVKN (1)                                                                                            |     |     |     |     |                       |                  |     | ALPQYLKTVYQHQA (1) |                    |     |
| AVPITPTLNREQL (1)                                                                                              |     |     |     |     |                       |                  |     |                    | AMKPWIQPK (1)      |     |
| RNAVPITPTLNREQL (1)                                                                                            |     |     |     |     |                       |                  |     |                    | IQPKTKVIPYVRYL (1) |     |

**Other identified peptides**

>Q27960 Sodium-dependent phosphate transport protein 2B

10 20 30 40 50 60 70 80 90 100 110  
MAPWPELENSQPTSEKYTVKADGEQSAKPEKAKETEKDDTGTPITKIELVPSHSTATLIEEPTVEDPWDLPDLKDTGLKWSEKILCVFQIGIGKFIILLVFLYFF  
EKDDTGTPITKIELVPSH (3)  
DTGTPITKIELVPSH (2)  
KDDTGTPITKIELVPSH (1)  
DDTGTPITKIELVPSH (1)

120 130 140 150 160 170 180 190 200 210 220  
VCSLDVLSSAFQLVGGKVAGKFFNNNSIMSNPLAGMVIQVLTVLVQSSSTSTSIVVSMVASSLLPVHAAIPIIMGANIGTSTINTIVALMQAGDRKEFRRAFAGATVHD

230 240 250 260 270 280 290 300 310 320 330  
FFNWL SVLVLLPLEAATGYLERLTNLVVE SFHFKNGEEAPELLKVITDPFTKLI IQLDK SILNQIAMNDES VQNKSMIKIWCKTFTNVTERNVTVPSPENCTSPSLCWTD

340 350 360 370 380 390 400 410 420 430 440  
GLYTWTIKNVTYKENIAKQHFVNFNLSDAIVGTILLITSLILCTCLILIVKLLG SVLRGQVA AVIKKTINTDFPYPFSWVTGYLAILV GAGMTFIVQSSSVFTSMT

450 460 470 480 490 500 510 520 530 540 550  
PLIGIGVISIQRAYPLTLGANIGTTTTAILAALASPGSTLKSSLQIALCHFFFNISGIILWYPIPFTRLP IRLAKGLGNISSKYRWF AIVYLVFFLLIPLAVFGLSLIG

560 570 580 590 600 610 620 630 640 650 660  
WPVLVGVASPIVLVILLVVVLKILQSF CPGSLPQKLR SWDFLPFWMRSLEP WDKLITSLTSCFQMRCCCCRVCCRLCCGLCGCSKCCRCTKCS EDLEEGKDEPVKSPEA

670 680 690  
FNNLAMDK EAQDGVTKSEVDASG TKIVSSVTAL

>P81265-2 Isoform Short of Polymeric immunoglobulin receptor

10 20 30 40 50 60 70 80 90 100 110  
MSRLFLACLLAIFPVVSMKSPIFGP EEVTSVEGRSVSIKCYYPPTS VNRHTRKYWCRQGAQGRCTTLISSEGYVSDDYVGRANL TNFPESGTFVVDISHLTHKDSGRYKC

120 130 140 150 160 170 180 190 200 210 220  
GLGISSRGLNFDVSLEVSEETAIPASPSVVKGV RGGSVTVSCPYNPKDANS AKYWCHWEEA QNGRCPRLVESRGLIKEQYEGRLALLTEPGNGTYTVILNQLTDQDTGFY

230 240 250 260 270 280 290 300 310 320 330  
WCVTDGDTRWISTVELKV VQGEPSLKV PKNVTAWLGEPLKLSCHFPCKFY SFEKYWCKWSNRGCSALPTQNDGPSQAFVSCDQNSQV VSLNLDTVTKEDEGWYWC GVKEG

340 350 360 370 380 390 400 410 420 430 440  
PRYGETAAVYVAVESRVKGSQ GAKQVKAAPAGAAIQSRAGEIQNKALLDPSFFAKESVKDAAGGPGAPADPGRPTGYSGSSKALVSTLVPLALV LVLVAGVVAIGVVRARHR  
FFAKESVKDAAGGPGAPADPGRPT (2)  
DAAGGPGAPADPGRPT (1)  
SVKDAAGGPGAPADPGRPT (1)

AKESVKDAAGGPGAPADPGRPT (1)

450 460 470 480 490 500 510 520 530  
KNVDRISIRSYRTDISMSDFENSRDFEGRDNMGASPEAQETSLGGKDEFATTTEDTVESKEPKKAKRSSKEEAEAFITFLQAKNLSAATQNGPTEA

>P80195 Glycosylation-dependent cell adhesion molecule

10 20 30 40 50 60 70 80 90 100 110  
MKFLCVLLLASLAATSLAILNKPEDETHLEAQPTDASAQFIRNLQISNEDLSKEPSISREDLISKEQIVIRSSRQPSQNPKLPLSILKEKHLRNATLGSEETTEHTPSD  
DASAQFIRNL (3) DLISKEQIVIR (1) SQNPKLPLSILK (1)  
DASAQFIRNLQISNE (1)  
120 130 140 150  
ASTTEGKLMELGHKIMRNLENTVKETIKYLKSLFSHAFEVVKT

>C6KGD8 Histatherin

10 20 30 40 50  
MKIFIFIFIMALILAMIRADSSEEKRHRKRKKHHRGYFQQYQPYQRYPLNYPPAYPPF  
NYPPAYPPF (3)

>A5GT44 3-phosphoshikimate 1-carboxyvinyltransferase (Synechococcus sp (strain RCC307))

10 20 30 40 50 60 70 80 90 100 110  
MGSVCLSGGSLHGSVRVPGDKSISHRALLFGAIATGTTTTIEGLLPAEDPLSTAACLAMGVTVSAIDSSGVVRVEGVGLDGLQEPAQVLDCGNSGTTMRLMLGLLAGRH  
120 130 140 150 160 170 180 190 200 210 220  
RHGRHFVLDGDGSLRRRPMARVAQPLAQMGAEIGGREGGNKAPLAIAGQTLSSGTTIRTPVASAQVKSALLLAGLTAKGSTTVIEPALSRDHSEMLRAFGAELISEPHAA  
230 240 250 260 270 280 290 300 310 320 330  
EGPTAIVRPGAELHGQHVVPDGISSAAFWLIAALVVPGETLTIENVGINPTRTGILDVLEQMGAPLEVLNQRDVAGEPVADLRVRYSPKAFEIGGELIPRLVDEIPIL  
mGAPLEVLNQRDV (1)  
340 350 360 370 380 390 400 410 420 430  
SVAALCAEGTSMRDAAELRVKETDRLAVMARQLRAMGAELEETTDGMVIPGGQRLTGAQVDSETDHRVAMSLAVAALIASGDTSIDQSEAAAVSYPSFWDELARLQRS

**Table S1: Files from ORBITRAP analysis of fraction 6**

| A2   | Sequence    | # PSMs | # Proteins | # Protein Groups | Protein Group Accessions | Modifications   | $\Delta Cn$ | q-Value | PEP       | IonScore | Exp Value   | Charge | MH+ [Da]   | $\Delta M$ [ppm] | RT [min] |
|------|-------------|--------|------------|------------------|--------------------------|-----------------|-------------|---------|-----------|----------|-------------|--------|------------|------------------|----------|
| High | VAPFPEVF    | 1      | 1          | 1                | P02662                   |                 | 0.0000      | 0.007   | 0.04344   | 33       | 9.681784003 | 2      | 905.47649  | -0.32            | 24.78    |
| High | FFVAPFPE    | 1      | 1          | 1                | P02662                   |                 | 0.0000      | 0.007   | 0.09821   | 27       | 28.06770869 | 2      | 953.47643  | -0.37            | 24.47    |
| High | VMFPPQSVL   | 1      | 1          | 1                | P02666                   |                 | 0.0000      | 0.007   | 0.04964   | 45       | 0.494577975 | 2      | 1017.54424 | 0.41             | 24.07    |
| High | VVPPFLQPE   | 2      | 1          | 1                | P02666                   |                 | 0.0000      | 0       | 0.000363  | 57       | 0.018245656 | 2      | 1025.56719 | 0.51             | 22.50    |
| High | VmFPPQSVL   | 1      | 1          | 1                | P02666                   | M2 (Oxidation)  | 0.0000      | 0.007   | 0.04304   | 39       | 2.451581831 | 2      | 1033.53874 | 0.01             | 23.38    |
| High | PFPEVFGKE   | 1      | 1          | 1                | P02662                   |                 | 0.0000      | 0       | 0.008823  | 35       | 5.636172121 | 2      | 1049.53154 | 1.20             | 21.75    |
| High | NVPGEIVESL  | 8      | 1          | 1                | P02666                   |                 | 0.0000      | 0       | 0.0004486 | 57       | 0.021863805 | 2      | 1056.55779 | 0.54             | 23.16    |
| High | NYPPAYPPP   | 3      | 1          | 1                | C6KGD8                   |                 | 0.0000      | 0.002   | 0.01853   | 48       | 0.249956019 | 2      | 1065.50432 | 0.27             | 23.22    |
| High | NIPPLTQTPV  | 1      | 1          | 1                | P02666                   |                 | 0.0000      | 0.002   | 0.01827   | 40       | 0.696529906 | 2      | 1079.60979 | 0.19             | 20.71    |
| High | VAPFPEVFGK  | 1      | 1          | 1                | P02662                   |                 | 0.0000      | 0.006   | 0.03205   | 29       | 20.21645871 | 2      | 1090.59331 | 0.08             | 21.87    |
| High | YIPIQYVLS   | 1      | 2          | 1                | P02668                   |                 | 0.0000      | 0       | 0.004535  | 40       | 0.964035887 | 2      | 1095.60918 | 0.63             | 24.39    |
| High | AMKPWIQPK   | 1      | 1          | 1                | P02663                   |                 | 0.0000      | 0.002   | 0.01865   | 28       | 14.82810541 | 3      | 1098.61274 | -0.16            | 17.49    |
| High | VYPPPGPIP   | 8      | 1          | 1                | P02666                   |                 | 0.0000      | 0       | 0.0001534 | 71       | 0.001171555 | 2      | 1100.57817 | 0.56             | 22.53    |
| High | IAKYIPIQY   | 1      | 1          | 1                | P02668                   |                 | 0.0000      | 0.002   | 0.01052   | 46       | 0.162868872 | 2      | 1108.64043 | 0.27             | 20.24    |
| High | HPHPLSFM    | 2      | 1          | 1                | P02668                   | M9 (Oxidation)  | 0.0000      | 0       | 0.005337  | 36       | 2.599880153 | 2      | 1118.52031 | 0.24             | 16.46    |
| High | APFPEVFGKE  | 1      | 1          | 1                | P02662                   |                 | 0.0000      | 0       | 0.003675  | 51       | 0.152771097 | 2      | 1120.56755 | 0.13             | 21.04    |
| High | FPKYVPEPF   | 1      | 1          | 1                | P02666                   |                 | 0.0000      | 0       | 0.002009  | 40       | 1.516676114 | 2      | 1123.58293 | 0.56             | 21.70    |
| High | ELQDKIHPF   | 1      | 1          | 1                | P02666                   |                 | 0.0000      | 0.007   | 0.07196   | 27       | 30.68032997 | 2      | 1126.58940 | 0.20             | 18.50    |
| High | YAKPAVRSPA  | 1      | 1          | 1                | P02668                   |                 | 0.0000      | 0.002   | 0.01662   | 26       | 45.99496154 | 3      | 1130.63147 | -0.22            | 14.83    |
| High | DASAQFIRNL  | 3      | 1          | 1                | P80195                   |                 | 0.0000      | 0       | 0.0003083 | 59       | 0.024519501 | 2      | 1134.58940 | -0.75            | 21.96    |
| High | KYIPIQYVL   | 2      | 2          | 1                | P02668                   |                 | 0.0000      | 0.007   | 0.0573    | 28       | 7.168561998 | 2      | 1136.67070 | -0.64            | 28.46    |
| High | NVPGEIVESLS | 1      | 1          | 1                | P02666                   |                 | 0.0000      | 0       | 0.000116  | 47       | 0.376050697 | 2      | 1143.58940 | 0.13             | 21.94    |
| High | QFIPYPPYA   | 1      | 1          | 1                | P02668                   |                 | 0.0000      | 0.002   | 0.02127   | 53       | 0.067122276 | 2      | 1161.56291 | 1.19             | 23.68    |
| High | VPPFLQPEVm  | 1      | 1          | 1                | P02666                   | M10 (Oxidation) | 0.0000      | 0       | 0.001174  | 49       | 0.230114459 | 2      | 1172.60210 | 0.02             | 22.08    |
| High | NQFLPYPPY   | 1      | 1          | 1                | P02668                   |                 | 0.0000      | 0       | 0.002655  | 41       | 0.95995991  | 2      | 1204.56877 | 1.19             | 23.69    |



|      |                  |    |   |   |          |                 |        |       |             |    |             |   |            |       |       |
|------|------------------|----|---|---|----------|-----------------|--------|-------|-------------|----|-------------|---|------------|-------|-------|
| High | IAKYIPIQYV       | 1  | 1 | 1 | P02668   |                 | 0.0000 | 0.006 | 0.02882     | 47 | 0.095405094 | 2 | 1207.70952 | 0.80  | 21.51 |
| High | VAPFPEVFGKE      | 1  | 1 | 1 | P02662   |                 | 0.0000 | 0     | 0.000009952 | 55 | 0.061501386 | 2 | 1219.63640 | 0.47  | 21.67 |
| High | KYIPIQYVLS       | 10 | 2 | 1 | P02668   |                 | 0.0000 | 0.002 | 0.01459     | 51 | 0.050206481 | 2 | 1223.70464 | 0.96  | 23.25 |
| High | DELQDKIHPF       | 1  | 1 | 1 | P02666   |                 | 0.0000 | 0.006 | 0.02988     | 32 | 9.675319894 | 2 | 1241.61650 | 0.30  | 19.90 |
| High | KPAAVRSPAQIL     | 1  | 1 | 1 | P02668   |                 | 0.0000 | 0     | 0.002528    | 45 | 0.109924736 | 2 | 1250.75871 | 0.57  | 18.18 |
| High | RHPHPLSFM        | 12 | 1 | 1 | P02668   |                 | 0.0000 | 0     | 0.006897    | 22 | 98.70954218 | 3 | 1258.62641 | 0.12  | 27.62 |
| High | VLSRYPYSGIN      | 1  | 1 | 1 | P02668   |                 | 0.0000 | 0     | 0.00002328  | 53 | 0.080212077 | 2 | 1268.66460 | 0.95  | 18.69 |
| High | RHPHPLSFm        | 3  | 1 | 1 | P02668   | M10 (Oxidation) | 0.0000 | 0.002 | 0.01456     | 26 | 40.32938131 | 2 | 1274.62212 | 0.75  | 15.59 |
| High | SLSQSKVLPVPQ     | 1  | 1 | 1 | P02666   |                 | 0.0000 | 0.007 | 0.04149     | 40 | 0.846810255 | 2 | 1282.73735 | 0.60  | 18.78 |
| High | FSDKIAKYIPI      | 1  | 1 | 1 | P02668   |                 | 0.0000 | 0     | 0.0001275   | 61 | 0.005241955 | 2 | 1294.74126 | 0.51  | 21.82 |
| High | DVPSERYLGYL      | 1  | 1 | 1 | P02662   |                 | 0.0000 | 0     | 0.000002605 | 65 | 0.004774921 | 2 | 1311.65874 | 0.58  | 22.34 |
| High | DLISKEQIVIR      | 1  | 1 | 1 | P80195   |                 | 0.0000 | 0.002 | 0.01731     | 53 | 0.038589215 | 2 | 1313.78044 | 1.26  | 19.42 |
| High | VIESPPEINTVQ     | 1  | 1 | 1 | P02668   |                 | 0.0000 | 0     | 0.001445    | 48 | 0.242440168 | 2 | 1325.69487 | 0.07  | 19.35 |
| High | FLPYPYAKPA       | 1  | 1 | 1 | P02668   |                 | 0.0000 | 0     | 0.000001573 | 69 | 0.002786347 | 2 | 1329.68840 | 0.44  | 20.61 |
| High | SQNPKLPLSILK     | 1  | 1 | 1 | P80195   |                 | 0.0000 | 0     | 0.001103    | 44 | 0.123173071 | 3 | 1337.81495 | -0.17 | 20.16 |
| High | VAPFPEVFGKEK     | 1  | 1 | 1 | P02662   |                 | 0.0000 | 0     | 0.000219    | 46 | 0.427583453 | 2 | 1347.73149 | 0.52  | 19.99 |
| High | EDELQDKIHPF      | 1  | 1 | 1 | P02666   |                 | 0.0000 | 0.002 | 0.02433     | 36 | 4.133464822 | 2 | 1370.66008 | 0.99  | 19.46 |
| High | LSFmAIPPKKNQ     | 1  | 2 | 1 | P02668   | M4 (Oxidation)  | 0.0000 | 0.006 | 0.0325      | 39 | 1.942695636 | 3 | 1389.75721 | 0.90  | 17.64 |
| High | LSLSQSKVLPVPQ    | 1  | 1 | 1 | P02666   |                 | 0.0000 | 0     | 0.0009985   | 52 | 0.03995823  | 2 | 1395.82207 | 1.02  | 20.31 |
| High | AVRSPAQILQWQ     | 1  | 2 | 1 | P02668   |                 | 0.0000 | 0.007 | 0.09472     | 35 | 3.725904626 | 2 | 1396.77117 | 1.11  | 21.62 |
| High | DAAGGPGAPADPGRPT | 1  | 2 | 1 | P81265-2 |                 | 0.0000 | 0     | 0.0002422   | 50 | 0.141333489 | 2 | 1406.66667 | 0.49  | 15.07 |
| High | IAKYIPIQYVLS     | 1  | 1 | 1 | P02668   |                 | 0.0000 | 0     | 0.002541    | 40 | 0.498879976 | 2 | 1407.82598 | 0.94  | 23.33 |
| High | KYKVPQLEIVPN     | 1  | 1 | 1 | P02662   |                 | 0.0000 | 0.002 | 0.02045     | 32 | 5.407702321 | 2 | 1427.82707 | 0.94  | 19.75 |
| High | APSFSDIPNPIGSE   | 5  | 1 | 1 | P02662   |                 | 0.0000 | 0     | 0.00003667  | 65 | 0.004862255 | 2 | 1430.68157 | 1.18  | 22.56 |
| High | VLPVPQKAVPYPQ    | 1  | 1 | 1 | P02666   |                 | 0.0000 | 0.002 | 0.01873     | 44 | 0.241754283 | 2 | 1435.83379 | 2.07  | 19.40 |
| High | PFPKYVPEPFTE     | 1  | 1 | 1 | P02666   |                 | 0.0000 | 0.006 | 0.03233     | 32 | 11.49529799 | 2 | 1450.72673 | 0.95  | 21.57 |
| High | AVPITPTLNREQL    | 1  | 1 | 1 | P02663   |                 | 0.0000 | 0     | 0.001817    | 37 | 1.743858157 | 2 | 1451.82329 | 1.08  | 20.03 |
| High | mGAPLEVLNQRDV    | 1  | 1 | 1 | A5GT44   | M1 (Oxidation)  | 0.0000 | 0.007 | 0.06658     | 48 | 0.291337664 | 2 | 1457.74639 | 3.16  | 29.00 |
| High | QFLPYPYAKPA      | 19 | 1 | 1 | P02668   |                 | 0.0000 | 0     | 0.008801    | 37 | 3.858805578 | 2 | 1457.74797 | 1.08  | 27.33 |

|      |                  |    |   |   |        |                                            |            |       |                 |    |                 |   |                |       |           |
|------|------------------|----|---|---|--------|--------------------------------------------|------------|-------|-----------------|----|-----------------|---|----------------|-------|-----------|
| High | KmEGSPYLFLTR     | 2  | 0 | 0 |        | M2 (Oxidation)                             | 0.0<br>000 | 0     | 0.00896<br>5    | 41 | 1.60122<br>6974 | 2 | 1457.7<br>4797 | 1.51  | 27.8<br>8 |
| High | QGPIVLNPWDQVK    | 1  | 1 | 1 | P02663 |                                            | 0.0<br>000 | 0     | 0.00000<br>351  | 52 | 0.08975<br>9934 | 2 | 1493.8<br>1206 | 0.60  | 21.9<br>5 |
| High | VLSLSQSKVLPVPQ   | 1  | 1 | 1 | P02666 |                                            | 0.0<br>000 | 0     | 1.385E-<br>07   | 96 | 1.10065<br>E-06 | 2 | 1494.8<br>9092 | 1.23  | 20.9<br>2 |
| High | EmPFKYPVEPF      | 1  | 1 | 1 | P02666 | M2 (Oxidation)                             | 0.0<br>000 | 0.002 | 0.01936         | 34 | 6.67005<br>5297 | 2 | 1496.7<br>1453 | 0.96  | 22.1<br>9 |
| High | FLPYYPYAKPAV     | 1  | 1 | 1 | P02668 |                                            | 0.0<br>000 | 0     | 0.00000<br>2163 | 61 | 0.01327<br>9052 | 2 | 1499.7<br>9460 | 0.83  | 21.5<br>6 |
| High | PQYLKTVYQHJK     | 1  | 1 | 1 | P02663 |                                            | 0.0<br>000 | 0     | 0.00118<br>9    | 38 | 3.40353<br>4579 | 3 | 1532.8<br>2218 | 0.11  | 18.6<br>0 |
| High | APSFSDIPNPIGSEN  | 2  | 1 | 1 | P02662 |                                            | 0.0<br>000 | 0     | 0.00020<br>71   | 58 | 0.02013<br>4245 | 2 | 1544.7<br>2429 | 0.96  | 21.9<br>9 |
| High | DAPSFSDIPNPIGSE  | 1  | 1 | 1 | P02662 |                                            | 0.0<br>000 | 0.002 | 0.01822         | 29 | 13.5867<br>9761 | 2 | 1545.7<br>0806 | 0.80  | 22.9<br>5 |
| High | SWMHQPHQPLPPT    | 4  | 1 | 1 | P02666 |                                            | 0.0<br>000 | 0     | 0.00623<br>2    | 28 | 23.4943<br>1909 | 2 | 1555.7<br>4907 | 1.01  | 19.1<br>3 |
| High | QYVLSRYPYGIN     | 26 | 1 | 1 | P02668 |                                            | 0.0<br>000 | 0     | 0.00000<br>0134 | 76 | 0.00046<br>5059 | 2 | 1559.7<br>8752 | 1.43  | 20.1<br>0 |
| High | TMARHPHPLHSFM    | 4  | 1 | 1 | P02668 |                                            | 0.0<br>000 | 0     | 0.00046<br>58   | 41 | 1.48595<br>5088 | 2 | 1561.7<br>5286 | 0.83  | 17.2<br>7 |
| High | KVLPVPQKAVPYPQ   | 2  | 1 | 1 | P02666 |                                            | 0.0<br>000 | 0     | 0.00145<br>8    | 39 | 0.48818<br>6096 | 2 | 1563.9<br>2729 | 0.96  | 18.5<br>3 |
| High | FPKYVVEPFTESQ    | 1  | 1 | 1 | P02666 |                                            | 0.0<br>000 | 0     | 0.00062<br>86   | 43 | 0.81301<br>5293 | 2 | 1568.7<br>6506 | 1.19  | 20.9<br>6 |
| High | SWmHQPHQPLPPT    | 1  | 1 | 1 | P02666 | M3 (Oxidation)                             | 0.0<br>000 | 0.007 | 0.06195         | 29 | 16.9911<br>81   | 2 | 1571.7<br>4602 | 2.29  | 17.0<br>5 |
| High | NQFLPYPYAKPA     | 22 | 1 | 1 | P02668 |                                            | 0.0<br>000 | 0     | 0.00132<br>5    | 62 | 0.01262<br>4502 | 2 | 1571.7<br>9167 | 1.50  | 21.1<br>8 |
| High | TMARHPHPLHSFm    | 2  | 1 | 1 | P02668 | M13 (Oxidation<br>)                        | 0.0<br>000 | 0     | 0.00578         | 28 | 25.0243<br>67   | 3 | 1577.7<br>4692 | 0.29  | 16.0<br>1 |
| High | FLKKISQRYQKF     | 1  | 1 | 1 | P02663 |                                            | 0.0<br>000 | 0     | 0.00375         | 17 | 164.235<br>699  | 3 | 1585.9<br>2258 | 0.77  | 16.8<br>0 |
| High | NTVPAKSCQAQPTTm  | 1  | 2 | 1 | P02668 | M15 (Oxidation<br>)                        | 0.0<br>000 | 0.007 | 0.0854          | 29 | 16.0621<br>1266 | 2 | 1592.7<br>4211 | 0.84  | 14.4<br>3 |
| High | TmARHPHPLHSFm    | 1  | 1 | 1 | P02668 | M2 (Oxidation)<br>;<br>M13 (Oxidation<br>) | 0.0<br>000 | 0     | 0.00092<br>88   | 24 | 52.4006<br>0137 | 2 | 1593.7<br>4309 | 1.07  | 15.6<br>3 |
| High | QTEDELQDKIHPP    | 1  | 1 | 1 | P02666 |                                            | 0.0<br>000 | 0.002 | 0.01341         | 44 | 0.69031<br>5244 | 2 | 1599.7<br>6799 | 1.88  | 19.4<br>2 |
| High | HQGLPQEVLNENLL   | 1  | 1 | 1 | P02662 |                                            | 0.0<br>000 | 0     | 1.367E-<br>07   | 56 | 0.05273<br>9312 | 2 | 1603.8<br>4538 | 0.92  | 22.4<br>6 |
| High | DTGTPIITKIELVPSH | 2  | 1 | 1 | Q27960 |                                            | 0.0<br>000 | 0     | 0.00026<br>67   | 62 | 0.01097<br>7675 | 2 | 1607.8<br>6565 | 1.04  | 20.2<br>3 |
| High | KEMPFKYPVEPF     | 2  | 1 | 1 | P02666 |                                            | 0.0<br>000 | 0     | 0.00000<br>1768 | 65 | 0.00718<br>4984 | 2 | 1608.8<br>1560 | 1.53  | 21.6<br>5 |
| High | QKEPMIGVNQELAY   | 1  | 1 | 1 | P02662 |                                            | 0.0<br>000 | 0.002 | 0.01408         | 34 | 7.85604<br>4125 | 2 | 1619.8<br>1120 | 0.84  | 20.2<br>0 |
| High | KEmPFKYPVEPF     | 2  | 1 | 1 | P02666 | M3 (Oxidation)                             | 0.0<br>000 | 0     | 0.00051<br>62   | 36 | 4.72574<br>8237 | 2 | 1624.8<br>0925 | 0.74  | 20.6<br>3 |
| High | RELEELNVPGEIVE   | 1  | 1 | 1 | P02666 |                                            | 0.0<br>000 | 0     | 0.00062<br>98   | 33 | 9.34238<br>5974 | 2 | 1625.8<br>3757 | -0.37 | 21.0<br>5 |
| High | QKEPmIGVNQELAY   | 1  | 1 | 1 | P02662 | M5 (Oxidation)                             | 0.0<br>000 | 0     | 0.00555<br>1    | 31 | 16.8400<br>3579 | 2 | 1635.8<br>0693 | 1.33  | 19.4<br>4 |
| High | QGPIVLNPWDQVKR   | 3  | 1 | 1 | P02663 |                                            | 0.0<br>000 | 0     | 0.00685<br>9    | 39 | 1.67867<br>9751 | 3 | 1649.9<br>1245 | 0.10  | 20.8<br>5 |

|      |                     |    |   |   |          |                    |            |       |                 |     |                 |   |                |       |           |
|------|---------------------|----|---|---|----------|--------------------|------------|-------|-----------------|-----|-----------------|---|----------------|-------|-----------|
| High | SKVLPVPQKAVPYPQ     | 2  | 1 | 1 | P02666   |                    | 0.0<br>000 | 0     | 0.00012<br>68   | 60  | 0.00532<br>847  | 2 | 1650.9<br>5964 | 1.10  | 18.4<br>5 |
| High | PFPKYPVEPFTESQ      | 2  | 1 | 1 | P02666   |                    | 0.0<br>000 | 0     | 0.00003<br>189  | 46  | 0.50744<br>2495 | 2 | 1665.8<br>1804 | 1.25  | 21.4<br>4 |
| High | KTEIPTINTIASGEPT    | 1  | 1 | 1 | P02668   |                    | 0.0<br>000 | 0     | 0.00001<br>839  | 68  | 0.00298<br>2272 | 2 | 1671.8<br>8176 | 1.03  | 20.2<br>3 |
| High | SNTVPAKSCQAQPTTm    | 1  | 1 | 1 | P02668   | M16(Oxidation<br>) | 0.0<br>000 | 0     | 0.00158<br>9    | 38  | 1.87157<br>5095 | 2 | 1679.7<br>7385 | 0.62  | 14.5<br>5 |
| High | NNQFLPYPPYAKPA      | 1  | 1 | 1 | P02668   |                    | 0.0<br>000 | 0     | 0.00034<br>65   | 66  | 0.00476<br>0289 | 2 | 1685.8<br>3440 | 1.27  | 21.1<br>4 |
| High | DASAQFIRNLQISNE     | 1  | 1 | 1 | P80195   |                    | 0.0<br>000 | 0     | 0.00929<br>4    | 33  | 10.4489<br>446  | 2 | 1705.8<br>5320 | 1.60  | 21.7<br>5 |
| High | EMPFKYPVEPFTE       | 1  | 1 | 1 | P02666   |                    | 0.0<br>000 | 0     | 0.00007<br>683  | 52  | 0.09917<br>6549 | 2 | 1710.8<br>1035 | 1.11  | 23.2<br>0 |
| High | IPNPIGSENSEKTTMP    | 1  | 1 | 1 | P02662   |                    | 0.0<br>000 | 0     | 0.00159<br>7    | 55  | 0.05505<br>082  | 2 | 1714.8<br>3476 | 1.78  | 19.2<br>0 |
| High | ALPQYLKTVYQHQK      | 2  | 1 | 1 | P02663   |                    | 0.0<br>000 | 0     | 0.00004<br>255  | 35  | 5.97318<br>4475 | 2 | 1716.9<br>4475 | 0.90  | 18.6<br>1 |
| High | IQPKTQVIPPVRYL      | 1  | 1 | 1 | P02663   |                    | 0.0<br>000 | 0     | 0.00332<br>4    | 23  | 14.8417<br>8408 | 3 | 1718.0<br>3812 | 1.01  | 19.7<br>2 |
| High | KVLPVPQKAVPYPQR     | 2  | 1 | 1 | P02666   |                    | 0.0<br>000 | 0     | 0.00000<br>0198 | 51  | 0.01988<br>8432 | 3 | 1720.0<br>2903 | 1.23  | 17.3<br>7 |
| High | SVKDAAGGPGAPADPGRPT | 1  | 2 | 1 | P81265-2 |                    | 0.0<br>000 | 0     | 0.00071<br>04   | 40  | 2.37883<br>8569 | 3 | 1720.8<br>6087 | -0.31 | 14.9<br>6 |
| High | RNAVPIPTLNREQL      | 1  | 1 | 1 | P02663   |                    | 0.0<br>000 | 0.002 | 0.02143         | 26  | 25.6430<br>1531 | 3 | 1721.9<br>6628 | 0.30  | 19.1<br>4 |
| High | DDTGTPI TKIELVPSH   | 1  | 1 | 1 | Q27960   |                    | 0.0<br>000 | 0     | 0.00570<br>3    | 36  | 6.03428<br>2069 | 2 | 1722.8<br>9385 | 1.69  | 20.4<br>4 |
| High | EmPFKYPVEPFTE       | 1  | 1 | 1 | P02666   | M2(Oxidation)      | 0.0<br>000 | 0     | 0.00001<br>866  | 59  | 0.01679<br>4492 | 2 | 1726.8<br>0693 | 2.07  | 21.7<br>6 |
| High | KHQGLPQEVLENLL      | 4  | 1 | 1 | P02662   |                    | 0.0<br>000 | 0     | 0.00099<br>16   | 54  | 0.08038<br>6833 | 2 | 1731.9<br>4036 | 0.85  | 21.3<br>8 |
| High | HKEMPFKYPVEPF       | 3  | 1 | 1 | P02666   |                    | 0.0<br>000 | 0     | 0.00002<br>948  | 53  | 0.11294<br>1863 | 2 | 1745.8<br>7505 | 1.72  | 21.4<br>1 |
| High | PFKYPVEPFTESQS      | 1  | 1 | 1 | P02666   |                    | 0.0<br>000 | 0.007 | 0.03796         | 27  | 40.2635<br>5345 | 2 | 1752.8<br>5027 | 1.30  | 21.0<br>9 |
| High | ELQDKIHPFAQTQSL     | 1  | 1 | 1 | P02666   |                    | 0.0<br>000 | 0.006 | 0.03216         | 31  | 15.7372<br>164  | 2 | 1754.9<br>0972 | 1.41  | 19.5<br>9 |
| High | APSFSDIPNPIGSENSE   | 48 | 1 | 1 | P02662   |                    | 0.0<br>000 | 0     | 2.29E-<br>09    | 122 | 6.40415<br>E-09 | 2 | 1760.8<br>0120 | 2.14  | 22.1<br>8 |
| High | KAVPYQRDMPIQAF      | 1  | 1 | 1 | P02666   |                    | 0.0<br>000 | 0     | 0.00039<br>21   | 44  | 0.91740<br>535  | 2 | 1760.9<br>1850 | 1.81  | 20.1<br>0 |
| High | HKEmPFKYPVEPF       | 1  | 1 | 1 | P02666   | M4(Oxidation)      | 0.0<br>000 | 0     | 0.00226<br>5    | 42  | 1.34063<br>127  | 2 | 1761.8<br>7029 | 1.88  | 19.6<br>3 |
| High | QGPIVLNPWDQVQRN     | 2  | 1 | 1 | P02663   |                    | 0.0<br>000 | 0     | 0.00022<br>36   | 50  | 0.15449<br>6093 | 2 | 1763.9<br>5818 | 1.68  | 20.5<br>6 |
| High | QSKVLPVPQKAVPYPQ    | 1  | 1 | 1 | P02666   |                    | 0.0<br>000 | 0     | 0.00000<br>367  | 49  | 0.08685<br>9637 | 2 | 1779.0<br>1933 | 1.65  | 18.4<br>5 |
| High | DKTEIPTINTIASGEPT   | 7  | 1 | 1 | P02668   |                    | 0.0<br>000 | 0     | 4.218E-<br>07   | 88  | 3.68557<br>E-05 | 2 | 1786.9<br>0837 | 0.78  | 20.6<br>1 |
| High | ALPQYLKTVYQHQA      | 1  | 1 | 1 | P02663   |                    | 0.0<br>000 | 0     | 0.00006<br>067  | 20  | 161.768<br>5963 | 3 | 1787.9<br>7928 | -0.58 | 18.8<br>0 |
| High | INNQFLPYPPYAKPA     | 51 | 1 | 1 | P02668   |                    | 0.0<br>000 | 0     | 1.554E-<br>07   | 64  | 0.00868<br>5841 | 2 | 1798.9<br>1863 | 1.28  | 22.8<br>3 |
| High | EmPFKYPVEPFTES      | 1  | 1 | 1 | P02666   | M2(Oxidation)      | 0.0<br>000 | 0.002 | 0.01649         | 30  | 11.6432<br>0474 | 2 | 1813.8<br>3769 | 1.27  | 21.5<br>6 |
| High | KVLPVPQKAVPYPQRD    | 1  | 1 | 1 | P02666   |                    | 0.0<br>000 | 0     | 0.00990<br>5    | 28  | 11.4473<br>2592 | 3 | 1835.0<br>5661 | 1.50  | 17.5<br>0 |

|      |                       |   |   |   |          |                 |        |       |             |    |             |   |            |       |       |
|------|-----------------------|---|---|---|----------|-----------------|--------|-------|-------------|----|-------------|---|------------|-------|-------|
| High | KDDTGTPTIKIELVPSH     | 1 | 1 | 1 | Q27960   |                 | 0.0000 | 0     | 0.00006694  | 43 | 1.016800172 | 3 | 1850.98697 | 0.58  | 19.25 |
| High | SQSKVLPVPQKAVPYPQ     | 4 | 1 | 1 | P02666   |                 | 0.0000 | 0     | 0.001452    | 64 | 0.003795117 | 2 | 1866.05193 | 1.87  | 18.44 |
| High | DELQDKIHPFAQTQSL      | 1 | 1 | 1 | P02666   |                 | 0.0000 | 0     | 0.00001365  | 51 | 0.166747456 | 2 | 1869.93596 | 0.95  | 20.45 |
| High | DAPFSFDIPNPIGSENSE    | 1 | 1 | 1 | P02662   |                 | 0.0000 | 0     | 2.001E-11   | 95 | 2.26752E-06 | 2 | 1875.82671 | 1.24  | 22.47 |
| High | RYPSYGLNYYQKQP        | 2 | 1 | 1 | P02668   |                 | 0.0000 | 0     | 0.0000329   | 68 | 0.003589147 | 2 | 1875.94060 | 0.94  | 18.91 |
| High | VIESPPEINTVQVTSTAV    | 1 | 1 | 1 | P02668   |                 | 0.0000 | 0     | 3.783E-07   | 76 | 0.000461441 | 2 | 1883.99956 | 1.82  | 21.50 |
| High | APFSFDIPNPIGSENSEK    | 1 | 1 | 1 | P02662   |                 | 0.0000 | 0     | 6.262E-11   | 84 | 7.0825E-05  | 2 | 1888.89556 | 1.67  | 20.77 |
| High | QDKTEIPTINTIASGEPT    | 1 | 1 | 1 | P02668   |                 | 0.0000 | 0     | 0.000003218 | 57 | 0.048112271 | 2 | 1914.96880 | 1.69  | 20.38 |
| High | EMPFKYPVEPFTE         | 1 | 1 | 1 | P02666   |                 | 0.0000 | 0     | 2.122E-08   | 71 | 0.001329051 | 2 | 1925.90178 | 1.41  | 22.68 |
| High | YQGPIVLNPWDQVQRN      | 1 | 1 | 1 | P02663   |                 | 0.0000 | 0.002 | 0.02465     | 40 | 2.378510439 | 3 | 1927.01841 | -0.07 | 21.32 |
| High | QYTDAPFSFDIPNPIGSE    | 1 | 1 | 1 | P02662   |                 | 0.0000 | 0     | 3.559E-10   | 76 | 0.000260406 | 2 | 1937.87822 | 0.94  | 23.16 |
| High | EmPFKYPVEPFTE         | 2 | 1 | 1 | P02666   | M2 (Oxidation)  | 0.0000 | 0     | 0.0009749   | 47 | 0.260367133 | 2 | 1941.89678 | 1.44  | 21.43 |
| High | KVPLEIVPNSAERLH       | 1 | 1 | 1 | P02662   |                 | 0.0000 | 0.007 | 0.0794      | 31 | 15.45876938 | 4 | 1959.06630 | 0.21  | 19.19 |
| High | SRYPYGLNYYQKQP        | 2 | 1 | 1 | P02668   |                 | 0.0000 | 0     | 1.265E-07   | 77 | 0.000430803 | 2 | 1962.97368 | 1.44  | 19.03 |
| High | HKEMPFKYPVEPFTE       | 1 | 1 | 1 | P02666   |                 | 0.0000 | 0     | 0.008044    | 37 | 4.306350315 | 3 | 1975.96341 | 0.55  | 20.32 |
| High | TDAPFSFDIPNPIGSENSE   | 2 | 1 | 1 | P02662   |                 | 0.0000 | 0     | 1.036E-11   | 95 | 2.14939E-06 | 2 | 1976.87468 | 1.33  | 22.32 |
| High | LSQSKVLPVPQKAVPYPQ    | 2 | 1 | 1 | P02666   |                 | 0.0000 | 0     | 2.878E-08   | 54 | 0.030617674 | 2 | 1979.13432 | 0.92  | 19.01 |
| High | EKDDTGTPTIKIELVPSH    | 3 | 1 | 1 | Q27960   |                 | 0.0000 | 0     | 0.000007084 | 45 | 0.647015651 | 2 | 1980.03069 | 1.10  | 19.32 |
| High | ALINNQFLPYPYAKPA      | 2 | 1 | 1 | P02668   |                 | 0.0000 | 0     | 0.0007376   | 40 | 2.354510149 | 2 | 1983.04057 | 1.54  | 23.36 |
| High | EQQOTEDELQDKIHPF      | 2 | 1 | 1 | P02666   |                 | 0.0000 | 0     | 0.000458    | 50 | 0.144092199 | 2 | 1984.92864 | 1.96  | 19.61 |
| High | APFSFDIPNPIGSENSEKT   | 2 | 1 | 1 | P02662   |                 | 0.0000 | 0     | 0.0003209   | 43 | 0.879975984 | 2 | 1989.94304 | 1.49  | 20.90 |
| High | HKEMPFKYPVEPFTE       | 2 | 1 | 1 | P02666   | M4 (Oxidation)  | 0.0000 | 0.006 | 0.03093     | 20 | 207.1052727 | 3 | 1991.95969 | 1.23  | 19.47 |
| High | DAPFSFDIPNPIGSENSEK   | 1 | 1 | 1 | P02662   |                 | 0.0000 | 0     | 1.327E-10   | 83 | 6.81867E-05 | 2 | 2003.92266 | 1.65  | 21.31 |
| High | EMPFKYPVEPFTE         | 1 | 1 | 1 | P02666   |                 | 0.0000 | 0     | 0.0002746   | 32 | 7.867598157 | 2 | 2012.93266 | 0.78  | 22.66 |
| High | IPNPIGSENSEKTTMPLW    | 1 | 1 | 1 | P02662   |                 | 0.0000 | 0     | 0.00001406  | 41 | 1.857839834 | 2 | 2013.99834 | 1.61  | 23.21 |
| High | SQSKVLPVPQKAVPYPQR    | 2 | 1 | 1 | P02666   |                 | 0.0000 | 0     | 0.00004905  | 48 | 0.154356706 | 3 | 2022.15232 | 1.37  | 17.63 |
| High | IPNPIGSENSEKTTmPLW    | 1 | 1 | 1 | P02662   | M15 (Oxidation) | 0.0000 | 0     | 0.00006641  | 47 | 0.403536513 | 2 | 2029.99321 | 1.57  | 21.64 |
| High | QFLPYPYAKPAVRSPA      | 1 | 1 | 1 | P02668   |                 | 0.0000 | 0.007 | 0.06303     | 26 | 53.92282528 | 3 | 2039.07676 | 0.87  | 20.48 |
| High | AKESVKDAAGPGAPADPGRPT | 1 | 2 | 1 | P81265-2 |                 | 0.0000 | 0.006 | 0.02788     | 29 | 33.47695459 | 3 | 2049.03769 | 0.78  | 14.82 |

|      |                       |   |   |   |        |                 |        |       |             |     |             |   |            |       |       |
|------|-----------------------|---|---|---|--------|-----------------|--------|-------|-------------|-----|-------------|---|------------|-------|-------|
| High | KEMPFKYPVEPFTESQ      | 2 | 1 | 1 | P02666 |                 | 0.0000 | 0     | 0.000001029 | 50  | 0.216684019 | 2 | 2053.99639 | 1.15  | 20.98 |
| High | HKEMPFKYPVEPFTES      | 1 | 1 | 1 | P02666 |                 | 0.0000 | 0     | 0.00002138  | 36  | 5.515215351 | 2 | 2062.99614 | 0.86  | 20.26 |
| High | FSDIPNPIGSENSEKTTMP   | 1 | 1 | 1 | P02662 |                 | 0.0000 | 0     | 0.000000506 | 40  | 1.582327122 | 2 | 2063.96221 | 1.50  | 20.79 |
| High | SLSQSKVLPVPQKAVPYPQ   | 2 | 1 | 1 | P02666 |                 | 0.0000 | 0     | 0.00003065  | 65  | 0.003231622 | 2 | 2066.16826 | 1.80  | 19.23 |
| High | KEmpPKYPVEPFTESQ      | 2 | 1 | 1 | P02666 | M3 (Oxidation)  | 0.0000 | 0.002 | 0.02514     | 32  | 12.28548485 | 3 | 2069.99118 | 1.08  | 20.12 |
| High | LSRYPYGLNYYQKQPV      | 1 | 1 | 1 | P02668 |                 | 0.0000 | 0     | 6.538E-07   | 53  | 0.122597963 | 3 | 2076.05509 | 0.08  | 19.30 |
| High | HKEmPFKYPVEPFTES      | 1 | 1 | 1 | P02666 | M4 (Oxidation)  | 0.0000 | 0     | 0.003067    | 43  | 0.932808778 | 2 | 2078.99248 | 1.54  | 19.44 |
| High | FSDIPNPIGSENSEKTTmP   | 1 | 1 | 1 | P02662 | M18 (Oxidation) | 0.0000 | 0     | 0.0002668   | 42  | 0.812216767 | 2 | 2079.95659 | 1.23  | 19.76 |
| High | GTQYTDAPSFSDIPNPIGSE  | 1 | 1 | 1 | P02662 |                 | 0.0000 | 0     | 1.221E-10   | 107 | 2.1708E-07  | 2 | 2095.94780 | 1.07  | 23.03 |
| High | TDAPSFSDIPNPIGSENSEK  | 1 | 1 | 1 | P02662 |                 | 0.0000 | 0     | 5.509E-14   | 106 | 2.93577E-07 | 2 | 2104.97051 | 1.65  | 21.15 |
| High | RHPHPLSFMAIPPKKNQ     | 3 | 1 | 1 | P02668 |                 | 0.0000 | 0     | 1.357E-11   | 37  | 4.199944171 | 5 | 2135.14661 | 1.02  | 16.57 |
| High | YTDAPSFSDIPNPIGSENSE  | 1 | 1 | 1 | P02662 |                 | 0.0000 | 0     | 1.40824E-15 | 116 | 1.57146E-08 | 2 | 2139.93926 | 1.81  | 22.84 |
| High | RHPHPLSFmAIIPPKKNQ    | 2 | 1 | 1 | P02668 | M10 (Oxidation) | 0.0000 | 0     | 0.000001791 | 27  | 42.84682153 | 5 | 2151.13889 | -0.21 | 15.78 |
| High | DKTEIPTINTIASGEPTSTPT | 1 | 1 | 1 | P02668 |                 | 0.0000 | 0     | 6.159E-09   | 85  | 7.71315E-05 | 2 | 2173.08891 | 0.82  | 20.72 |
| High | MAPKHKEMPFKYPVEPFF    | 1 | 1 | 1 | P02666 |                 | 0.0000 | 0.006 | 0.02743     | 22  | 176.3318329 | 3 | 2173.09897 | 0.72  | 19.83 |
| High | VLSRYPYGLNYYQKQPV     | 2 | 1 | 1 | P02668 |                 | 0.0000 | 0     | 0.00003317  | 75  | 0.000834969 | 2 | 2175.12871 | 2.46  | 19.64 |
| High | MAPKHKEmpFKYPVEPFF    | 1 | 1 | 1 | P02666 | M8 (Oxidation)  | 0.0000 | 0     | 0.0001028   | 21  | 190.4666551 | 3 | 2189.09360 | 0.58  | 19.03 |
| High | HKEMPFKYPVEPFTESQ     | 6 | 1 | 1 | P02666 |                 | 0.0000 | 0     | 0.0007974   | 42  | 1.180289123 | 3 | 2191.05704 | 1.87  | 20.09 |
| High | SEEQQQTEDELQDKIHPP    | 1 | 1 | 1 | P02666 |                 | 0.0000 | 0     | 0.0001131   | 34  | 4.194534125 | 3 | 2201.00132 | 0.88  | 19.99 |
| High | ARHHPHLSFMAIPPKKNQ    | 3 | 1 | 1 | P02668 |                 | 0.0000 | 0     | 0.000001538 | 36  | 4.755476903 | 4 | 2206.18715 | 2.54  | 16.52 |
| High | HKEmPFKYPVEPFTESQ     | 2 | 1 | 1 | P02666 | M4 (Oxidation)  | 0.0000 | 0     | 0.007757    | 33  | 9.108488273 | 3 | 2207.05021 | 1.06  | 19.29 |
| High | SDIPNPIGSENSEKTTMLW   | 1 | 1 | 1 | P02662 |                 | 0.0000 | 0     | 0.00000194  | 53  | 0.089417473 | 2 | 2216.05986 | 2.61  | 23.42 |
| High | TKKTKLTEEEKNRLNFLK    | 1 | 1 | 1 | P02663 |                 | 0.0000 | 0     | 0.0004409   | 22  | 42.4481283  | 4 | 2220.27407 | 1.32  | 16.62 |
| High | ARHHPHLSFmAIIPPKKNQ   | 2 | 1 | 1 | P02668 | M11 (Oxidation) | 0.0000 | 0     | 4.063E-07   | 34  | 8.870423925 | 5 | 2222.17832 | 0.83  | 15.74 |
| High | SLSQSKVLPVPQKAVPYPQR  | 2 | 1 | 1 | P02666 |                 | 0.0000 | 0     | 6.152E-07   | 52  | 0.053196777 | 3 | 2222.26792 | 1.02  | 18.37 |
| High | QYTDAPSFSDIPNPIGSENSE | 1 | 1 | 1 | P02662 |                 | 0.0000 | 0     | 3.11E-08    | 69  | 0.000776118 | 2 | 2267.99809 | 1.82  | 22.75 |
| High | HKEMPFKYPVEPFTESQS    | 1 | 1 | 1 | P02666 |                 | 0.0000 | 0     | 0.007768    | 39  | 2.085552005 | 3 | 2278.08652 | 0.68  | 20.07 |
| High | HKEmPFKYPVEPFTESQS    | 1 | 1 | 1 | P02666 | M4 (Oxidation)  | 0.0000 | 0     | 0.0006296   | 49  | 0.199191859 | 2 | 2294.08232 | 1.06  | 19.38 |
| High | QSEEQQQTEDELQDKIHPP   | 1 | 1 | 1 | P02666 |                 | 0.0000 | 0     | 0.0001732   | 38  | 1.708866216 | 3 | 2329.06144 | 1.49  | 20.00 |

|      |                                             |   |   |   |          |                |        |       |             |    |             |   |            |       |       |
|------|---------------------------------------------|---|---|---|----------|----------------|--------|-------|-------------|----|-------------|---|------------|-------|-------|
| High | ARHPHPLSFmAIPPKKNQD                         | 1 | 1 | 1 | P02668   | M11(Oxidation) | 0.0000 | 0     | 0.00007616  | 34 | 11.17789396 | 5 | 2337.20335 | -0.03 | 15.79 |
| High | FFAKESVKDAAGGPGAPADPGRPT                    | 2 | 2 | 1 | P81265-2 |                | 0.0000 | 0     | 6.887E-10   | 58 | 0.044331055 | 3 | 2343.17740 | 1.91  | 17.13 |
| High | TQYTDAPSFSDIPNPIGSENSE                      | 1 | 1 | 1 | P02662   |                | 0.0000 | 0     | 5.83E-08    | 62 | 0.004242968 | 2 | 2369.04790 | 2.64  | 22.73 |
| High | QYTDAPSFSDIPNPIGSENSEK                      | 1 | 1 | 1 | P02662   |                | 0.0000 | 0     | 8.51E-11    | 98 | 1.92365E-06 | 2 | 2396.09258 | 1.52  | 21.62 |
| High | DKTEIPTINTIASGEPTSTPTTE                     | 2 | 1 | 1 | P02668   |                | 0.0000 | 0     | 8.459E-08   | 83 | 0.00012411  | 2 | 2403.17827 | 0.35  | 20.68 |
| High | GTQYTDAPSFSDIPNPIGSENSE                     | 4 | 1 | 1 | P02662   |                | 0.0000 | 0     | 0.000001154 | 80 | 5.87599E-05 | 2 | 2426.07012 | 2.89  | 22.91 |
| High | QYVLSRYPYGLNYYQQKPV                         | 1 | 1 | 1 | P02668   |                | 0.0000 | 0     | 2.994E-10   | 42 | 1.787349547 | 3 | 2466.24826 | 1.22  | 20.69 |
| High | QDKTEIPTINTIASGEPTSTPTTE                    | 2 | 1 | 1 | P02668   |                | 0.0000 | 0     | 0.00001874  | 71 | 0.00183246  | 2 | 2531.23979 | 1.50  | 20.50 |
| High | GTQYTDAPSFSDIPNPIGSENSEK                    | 2 | 1 | 1 | P02662   |                | 0.0000 | 0     | 0.0001965   | 64 | 0.004476793 | 2 | 2554.16142 | 1.31  | 21.56 |
| High | DKTEIPTINTIASGEPTSTPTTEAVE                  | 2 | 1 | 1 | P02668   |                | 0.0000 | 0     | 0.001607    | 54 | 0.097540087 | 2 | 2702.33208 | 2.41  | 21.16 |
| High | EAYLAEGLDEACHAYRGMTKRNRpm                   | 1 | 0 | 0 |          | M24(Oxidation) | 0.0000 | 0.002 | 0.0141      | 12 | 691.5812934 | 5 | 2785.26289 | 0.88  | 14.93 |
| High | AIPPKKNQDKTEIPTINTIASGEPTSTPTTE             | 1 | 1 | 1 | P02668   |                | 0.0000 | 0     | 0.0004476   | 21 | 273.418359  | 4 | 3279.70009 | 1.37  | 19.05 |
| High | ADESTYWGGETTWLGNEVRYSSGNEGHKESGVIDGSESKKGHK | 1 | 0 | 0 |          |                | 0.0000 | 0.002 | 0.01373     | 11 | 1114.082893 | 6 | 4669.15698 | 2.27  | 15.31 |
